# Supplementary material for: Habitat differentiation and conservation gap of Magnolia biondii, M. denudata, and M. sprengeri in China
Source: PeerJ. 2019 Mar 12;6:e6126. doi: 10.7717/peerj.6126 (PMC6419747; doi:10.7717/peerj.6126)
Supplement: Supplemental Information 1 [file peerj-07-6126-s001.docx]

Table S1 Correlation coefficients between pairs of environmental variables

|  | altitude | aspect | slope | Annual mean temperature | Mean diurnal range | Isothermality | Temperature seasonality | Max temperature of warmest month | Min temperature of coldest month | Temperature annual range | Mean temperature of wettest quarter | Mean temperature of driest quarter | Mean temperature of warmest quarter | Mean temperature of coldest quarter | Annual precipitation | Precipitation of wettest month | Precipitation of driest month | Precipitation seasonality | Precipitation of wettest quarter | Precipitation of driest quarter | Precipitation of warmest quarter |
| --- | --- | --- | --- | --- | --- | --- | --- | --- | --- | --- | --- | --- | --- | --- | --- | --- | --- | --- | --- | --- | --- |
| aspect | 0.094 |  |  |  |  |  |  |  |  |  |  |  |  |  |  |  |  |  |  |  |  |
| slope | 0.138* | 0.067 |  |  |  |  |  |  |  |  |  |  |  |  |  |  |  |  |  |  |  |
| Annual mean temperature | -0.814** | -0.108 | -0.147* |  |  |  |  |  |  |  |  |  |  |  |  |  |  |  |  |  |  |
| Mean diurnal range | 0.478** | -0.203** | 0.262** | -0.349** |  |  |  |  |  |  |  |  |  |  |  |  |  |  |  |  |  |
| Isothermality | 0.636** | -0.171* | 0.136* | -0.260** | 0.807** |  |  |  |  |  |  |  |  |  |  |  |  |  |  |  |  |
| Temperature seasonality | -0.600** | -0.041 | 0.064 | 0.113 | -0.233** | -0.715** |  |  |  |  |  |  |  |  |  |  |  |  |  |  |  |
| Max temperature of warmest month | -0.918** | -0.115 | -0.082 | 0.884** | -0.249** | -0.411** | 0.495** |  |  |  |  |  |  |  |  |  |  |  |  |  |  |
| Min temperature of coldest month | -0.609** | -0.011 | -0.230** | 0.896** | -0.404** | -0.132* | -0.215** | 0.664** |  |  |  |  |  |  |  |  |  |  |  |  |  |
| Temperature annual range | -0.300** | -0.148* | 0.206** | -0.118 | 0.247** | -0.303** | 0.861** | 0.308** | -0.476** |  |  |  |  |  |  |  |  |  |  |  |  |
| Mean temperature of wettest quarter | -0.574** | -0.084 | -0.055 | 0.668** | -0.137* | -0.131 | 0.179** | 0.613** | 0.506** | 0.089 |  |  |  |  |  |  |  |  |  |  |  |
| Mean temperature of driest quarter | -0.632** | -0.055 | -0.115 | 0.897** | -0.295** | -0.100 | -0.151* | 0.714** | 0.939** | -0.359** | 0.406** |  |  |  |  |  |  |  |  |  |  |
| Mean temperature of warmest quarter | -0.953** | -0.103 | -0.117 | 0.914** | -0.426** | -0.523** | 0.478** | 0.963** | 0.723** | 0.208** | 0.634** | 0.741** |  |  |  |  |  |  |  |  |  |
| Mean temperature of coldest quarter | -0.582** | -0.058 | -0.161* | 0.916** | -0.292** | -0.028 | -0.251** | 0.671** | 0.965** | -0.449** | 0.550** | 0.945** | 0.717** |  |  |  |  |  |  |  |  |
| Annual precipitation | -0.510** | 0.069 | -0.034 | 0.491** | -0.431** | -0.383** | 0.092 | 0.464** | 0.569** | -0.184** | -0.080 | 0.639** | 0.484** | 0.479** |  |  |  |  |  |  |  |
| Precipitation of wettest month | -0.436** | -0.018 | 0.030 | 0.537** | -0.228** | -0.148* | -0.053 | 0.461** | 0.583** | -0.234** | 0.066 | 0.658** | 0.460** | 0.553** | 0.877** |  |  |  |  |  |  |
| Precipitation of driest month | -0.582** | 0.063 | -0.061 | 0.498** | -0.496** | -0.521** | 0.267** | 0.526** | 0.493** | -0.031 | -0.119 | 0.607** | 0.556** | 0.426** | 0.887** | 0.667** |  |  |  |  |  |
| Precipitation seasonality | 0.493** | -0.142* | 0.083 | -0.154* | 0.519** | 0.715** | -0.589** | -0.346** | -0.100 | -0.306** | 0.159* | -0.144* | -0.375** | 0.016 | -0.532** | -0.118 | -0.725** |  |  |  |  |
| Precipitation of wettest quarter | -0.418** | -0.015 | 0.019 | 0.567** | -0.256** | -0.123 | -0.137* | 0.447** | 0.647** | -0.327** | 0.038 | 0.721** | 0.456** | 0.614** | 0.908** | 0.975** | 0.717** | -0.151* |  |  |  |
| Precipitation of driest quarter | -0.590** | 0.041 | -0.047 | 0.462** | -0.469** | -0.537** | 0.332** | 0.536** | 0.440** | 0.050 | -0.144* | 0.562** | 0.549** | 0.366** | 0.874** | 0.649** | 0.987** | -0.758** | 0.686** |  |  |
| Precipitation of warmest quarter | -0.148* | 0.021 | -0.029 | 0.334** | -0.124 | 0.082 | -0.320** | 0.172* | 0.483** | -0.419** | 0.156* | 0.441** | 0.179** | 0.438** | 0.634** | 0.818** | 0.280** | 0.182** | 0.795** | 0.244** |  |
| Precipitation of coldest quarter | -0.570** | 0.017 | -0.021 | 0.483** | -0.414** | -0.460** | 0.265** | 0.538** | 0.484** | 0.005 | -0.147* | 0.613** | 0.541** | 0.411** | 0.902** | 0.694** | 0.968** | -0.713** | 0.731** | 0.979** | 0.283** |
